# Supplementary material for: RPS15a Silencing Suppresses Cell Proliferation and Migration of Gastric Cancer
Source: PubMed Central journal article supplement — Yonsei Med J. 2018 Nov 15;59(10):1166–73. doi: 10.3349/ymj.2018.59.10.1166 (PMC6240561; doi:10.3349/ymj.2018.59.10.1166), 2018-11-15
Supplement: ymj-59-1166-s001.pdf [file ymj-59-1166-s001.pdf]

**Supplementary Table 1.** Primer Sequences Used in Reverse Transcription-PCR

| <b>Target gene</b> | <b>Forward primer</b>         | <b>Reverse primer</b>               |
|--------------------|-------------------------------|-------------------------------------|
| RPS15a             | 5'-TGT GAT GAA GCA TG-3'      | 5'-GTC AGT ACA ATG AAA C-3'         |
| $\beta$ -actin     | 5'-GAG ACC TTC AAC CCA GCC-3' | 5'-GGA GTA CAG GTC TTT GCG GAT G-3' |

RPS15a, ribosomal protein S15a.
