# Supplementary material for: RPS15a Silencing Suppresses Cell Proliferation and Migration of Gastric Cancer
Source: PubMed Central journal article supplement — Yonsei Med J. 2018 Nov 15;59(10):1166–73. doi: 10.3349/ymj.2018.59.10.1166 (PMC6240561; doi:10.3349/ymj.2018.59.10.1166), 2018-11-15
Supplement: ymj-59-1166-s002.pdf [file ymj-59-1166-s002.pdf]

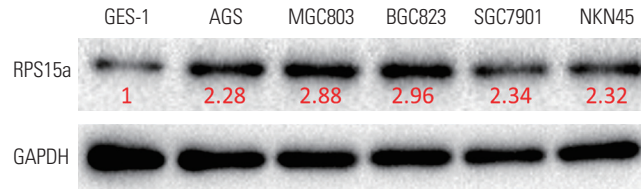

**Supplementary Fig. 1.** The ribosomal protein S15a (RPS15a) expression in various gastric cancer cells. RPS15a expression was the highest in BGC823 cells, compared with other gastric cancer cells.
