# Supplementary material for: RPS15a Silencing Suppresses Cell Proliferation and Migration of Gastric Cancer
Source: PubMed Central journal article supplement — Yonsei Med J. 2018 Nov 15;59(10):1166–73. doi: 10.3349/ymj.2018.59.10.1166 (PMC6240561; doi:10.3349/ymj.2018.59.10.1166), 2018-11-15
Supplement: ymj-59-1166-s003.pdf [file ymj-59-1166-s003.pdf]

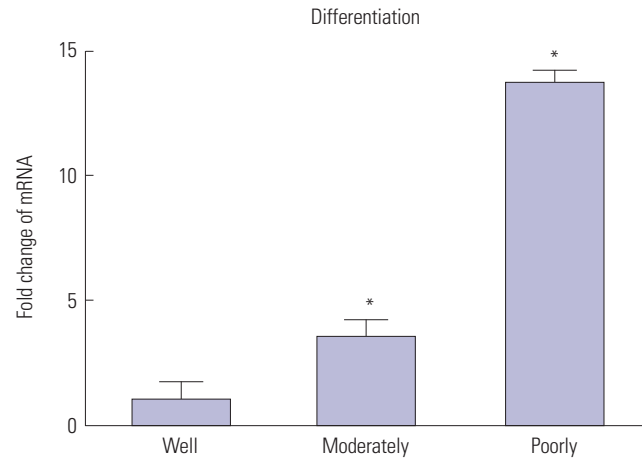

**Supplementary Fig. 2** The expression of ribosomal protein S15a (RPS15a) in gastric cancer tissues with different degree of differentiation. RPS15a mRNA expression levels in the moderately and poorly differentiated gastric cancer was significantly greater than that in well differentiated respectively (\* $p < 0.01$ ).
