# Supplementary material for: RPS15a Silencing Suppresses Cell Proliferation and Migration of Gastric Cancer
Source: PubMed Central journal article supplement — Yonsei Med J. 2018 Nov 15;59(10):1166–73. doi: 10.3349/ymj.2018.59.10.1166 (PMC6240561; doi:10.3349/ymj.2018.59.10.1166), 2018-11-15
Supplement: ymj-59-1166-s004.pdf [file ymj-59-1166-s004.pdf]

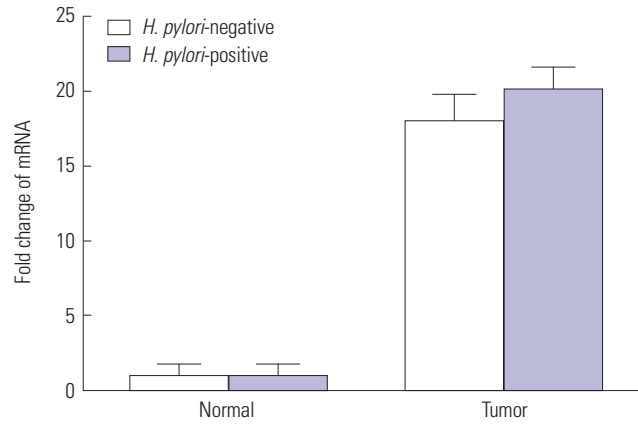

**Supplementary Fig. 3.** The expression of ribosomal protein S15a (RPS15a) in gastric cancer tissues with *Helicobacter pylori*-positive and -negative. There was no significant difference in the mRNA expression of RPS15a between *H. pylori* positive and negative gastric cancer tissue ( $p>0.05$ ).
